# Supplementary material for: Insight into Physiological and Biochemical Determinants of Salt Stress Tolerance in Tetraploid Citrus
Source: MDPI journal article supplement (doi:10.3390/antiox12081640), 2023-08-19
Supplement: s1 [file s1]

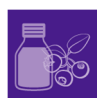

## Supplemental

**Table S1.** Coefficient of regression (ncomp = 2) for variables selected by sPLS-DA for control leaves and roots.

| Tissu  | Leaf variable          | X (PC1) | Y (PC2) |
|--------|------------------------|---------|---------|
| Roots  | Cl <sup>-</sup>        | -1.00   | 0.00    |
|        | Mg <sup>2+</sup>       | 0.97    | -0.08   |
|        | DHAR                   | -0.18   | -0.99   |
|        | APX                    | -0.18   | -0.99   |
| Leaves | <i>P<sub>net</sub></i> | -0.99   | 0.09    |
|        | DHA                    | -0.95   | 0.14    |
|        | CAT                    | 0.35    | -0.87   |
|        | APX                    | -0.36   | -0.93   |

Chloride (Cl<sup>-</sup>) and Magnesium (Mg<sup>2+</sup>) content were expressed in mg.g<sup>-1</sup>. DHAR, APX and CAT activity were expressed in μmol. min<sup>-1</sup>. mg<sup>-1</sup> protein. DHA was expressed in μmol.g<sup>-1</sup>. *P<sub>net</sub>* was expressed in μmol. m<sup>-1</sup>.s<sup>-1</sup>.

**Table S2.** Statistical analysis of biochemical and photosynthetic variables selected using sPLSDA, for 2x and 4x Trifoliolate orange and Cleopatra in control leaves and roots. Significance of variation, size effect, and pairwise comparison between groups.

| Tissu          | Variable               | Pvalue | Size effect | Pairwise comparison |                    |                    |                     |
|----------------|------------------------|--------|-------------|---------------------|--------------------|--------------------|---------------------|
|                |                        |        |             | CL2x                | CL4x               | PO2x               | PO4x                |
| Control roots  | Cl <sup>-</sup>        | 0.0361 | 0.692       | 50.63 <sup>bc</sup> | 53.96 <sup>c</sup> | 22.42 <sup>a</sup> | 26.39 <sup>ab</sup> |
|                | Mg <sup>2+</sup>       | 0.032  | 0.726       | 5.67 <sup>b</sup>   | 6.08 <sup>b</sup>  | 3.24 <sup>ab</sup> | 2.76 <sup>a</sup>   |
|                | DHAR                   | 0.0286 | 0.756       | 0.21 <sup>b</sup>   | 0.01 <sup>a</sup>  | 0.15 <sup>b</sup>  | 0.02 <sup>ab</sup>  |
|                | APX                    | 0.0286 | 0.756       | 0.47 <sup>b</sup>   | 0.02 <sup>a</sup>  | 0.35 <sup>b</sup>  | 0.05 <sup>ab</sup>  |
| Control leaves | <i>P<sub>net</sub></i> | 0.0150 | 0.932       | 7.88 <sup>bc</sup>  | 8.66 <sup>c</sup>  | 3.47 <sup>a</sup>  | 5.44 <sup>ab</sup>  |
|                | DHA                    | 0.0345 | 0.705       | 31.31 <sup>ab</sup> | 39.58 <sup>b</sup> | 1.43 <sup>a</sup>  | 1.53 <sup>a</sup>   |
|                | CAT                    | 0.0213 | 0.838       | 3.03 <sup>b</sup>   | 0.78 <sup>a</sup>  | 1.89 <sup>ab</sup> | 2.68 <sup>b</sup>   |
|                | APX                    | 0.0156 | 0.923       | 0.38 <sup>b</sup>   | 0.11 <sup>a</sup>  | 0.14 <sup>a</sup>  | 0.26 <sup>ab</sup>  |

Chloride (Cl<sup>-</sup>) and Magnesium (Mg<sup>2+</sup>) content were expressed in mg.g<sup>-1</sup>. DHAR, APX and CAT activity were expressed in μmol. min<sup>-1</sup>. mg<sup>-1</sup> protein. DHA was expressed in μmol.g<sup>-1</sup>. *P<sub>net</sub>* was expressed in μmol. m<sup>-1</sup>.s<sup>-1</sup>. Non-parametric Kruskal-Wallis test was applied ( $p \leq \alpha$ , with  $\alpha = 0.05$ ) as well as the size effect Eta2 which defined the magnitude of the difference between 2 groups (0.2=small, 0.5=medium, 0.8=large). Pairwise comparison by Dunn's test was performed at p-value < 0.05. Groups are separated by letters. each group is assigned one or more letters. Groups sharing the same letter are not significantly different. Letter displays a clear and succinct way to present results of multiple comparisons.

**Table S3.** Variable selection by sPLS-DA for control and stressed leaves and roots: X and Y are coefficient of regression for each principal component (PC).

| Root variables   | X (PC2) | Y(PC3) |
|------------------|---------|--------|
| Ca <sup>2+</sup> | -0.87   | 0.27   |
| P                | 0.84    | -0.27  |
| MDA              | -0.92   | -0.16  |
| Asa              | -0.76   | 0.00   |
| DHAR             | -0.64   | -0.06  |
| APX              | -0.80   | -0.16  |

Calcium (Cl<sup>-</sup>) and potassium (Mg<sup>2+</sup>) content were expressed in mg.g<sup>-1</sup>. DHAR and APX activity were expressed in  $\mu\text{mol} \cdot \text{min}^{-1} \cdot \text{mg}^{-1}$  protein. AsA was expressed in  $\mu\text{mol} \cdot \text{g}^{-1}$ .  $P_{\text{net}}$  was expressed in  $\mu\text{mol} \cdot \text{m}^{-1} \cdot \text{s}^{-1}$ .

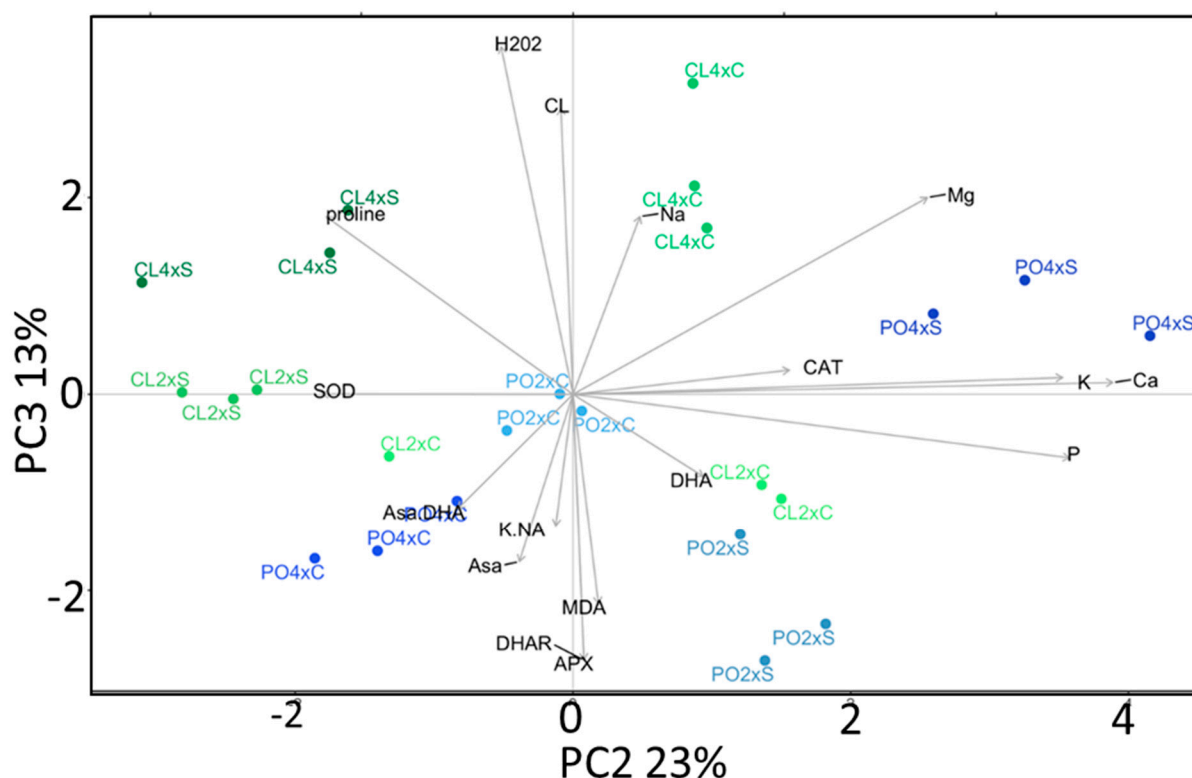

**Figure S1.** Biplot of PLS-DA for control (C) and stressed (S) roots on PC2 and 3. Measurements were performed after four weeks of salt treatment (90 mM).

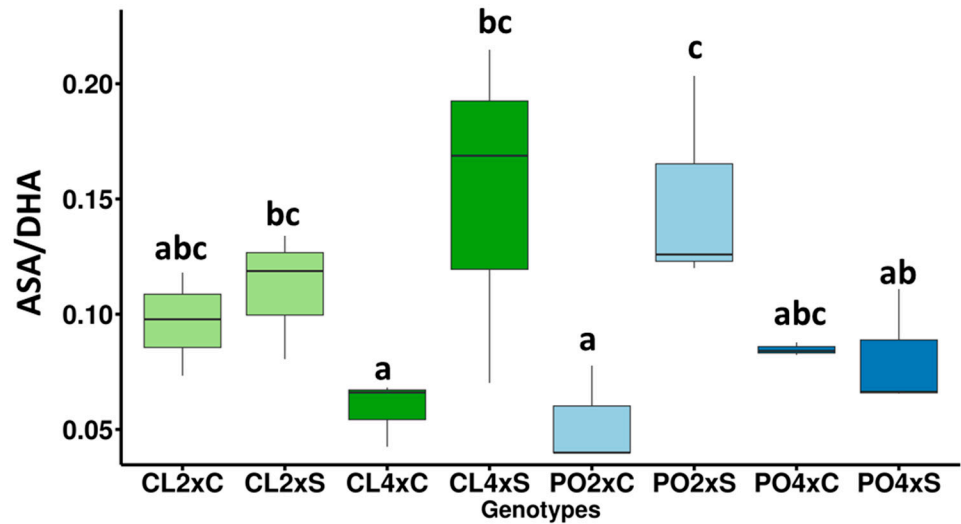

**Figure S2.** Root Asa/DHA under control (C) and salt stress conditions (S) after four weeks of salt treatment (90 mM). Significance of the values were analyzed using Kruskal wallis test ( $P > 0.05$ ) and mean comparison using Dunn test ( $p\text{-val} < 0.05$ ). C and S represent Control and stressed plants respectively. AsA and DHA were expressed in  $\text{mol.g}^{-1}$ . Groups are separated by letters. each group is assigned one or more letters. Groups sharing the same letter are not significantly different. Letter displays a clear and succinct way to present results of multiple comparisons.

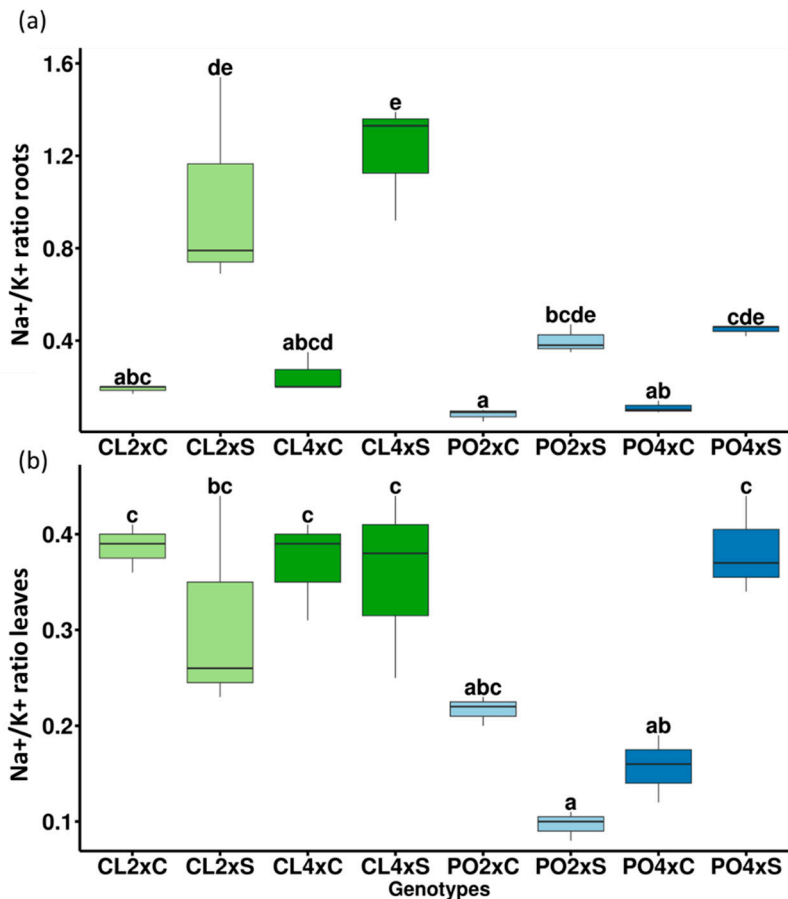

**Figure S3.** root  $\text{Na}^+/\text{K}^+$  ratio under control (C) and salt stress conditions (S) after four weeks of salt treatment (90 mM) in roots (a) and in leaves (b). Significance of the values were analyzed using Kruskal wallis test ( $P > 0.05$ ) and mean comparison using Dunn test ( $p\text{-val} < 0.05$ ). C and S represent Control and stressed plants respectively.  $\text{Na}^+$  and  $\text{K}^+$  content were expressed in  $\text{mg/g}$ . Groups are separated by letters. each group is assigned one or more letters. Groups sharing the same letter are not significantly different. Letter displays a clear and succinct way to present results of multiple comparisons.
